# Supplementary material for: Where will the next flank eruption at Etna occur? An updated spatial probabilistic assessment
Source: Copernicus journal article supplement (doi:10.5194/nhess-24-4431-2024), 2024-12-09
Supplement: Supplementary file 1 [file nhess-24-4431-2024-supplement.zip]

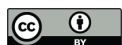

*Supplement of*

## **Where will the next flank eruption at Etna occur? An updated spatial probabilistic assessment**

**Laura Sandri et al.**

*Correspondence to:* Laura Sandri ([laura.sandri@ingv.it](mailto:laura.sandri@ingv.it))

- [nhess-24-4431-2024-supplement-title-page.pdf](#)
- [Etna\\_vent\\_Supplementary.pdf](#)
- [Probability\\_Models\\_Flank\\_Etna.csv](#)

The copyright of individual parts of the supplement might differ from the article licence.
